# Supplementary material
Source: PubMed Central journal article supplement (PMC2383996)

**ONLINE REPOSITORY**

**Sleep-disordered Breathing and Cardiovascular Disease:  
An Outcome-Based Definition of Hypopneas**

Naresh M. Punjabi  
Anne Newman  
Terry Young  
Helaine E. Resnick  
Mark Sanders

**Table 1E:** Characteristics of subjects with and without cardiovascular disease (CVD) status data.

| Characteristic                                | Missing CVD data<br>(n = 335) |                | CVD data available<br>(n = 6106) |                 | p-value  |
|-----------------------------------------------|-------------------------------|----------------|----------------------------------|-----------------|----------|
|                                               | % or Median (IQR*)            |                | % or Median (IQR*)               |                 |          |
| Gender (%)                                    |                               |                |                                  |                 |          |
| Men                                           |                               | 49.2           |                                  | 47.02           | 0.43     |
| Women                                         |                               | 50.8           |                                  | 52.98           |          |
| Race (%)                                      |                               |                |                                  |                 |          |
| Caucasian                                     |                               | 53.4           |                                  | 77.9            | < 0.0001 |
| Native-American                               |                               | 8.1            |                                  | 9.6             |          |
| African-American                              |                               | 31.9           |                                  | 6.7             |          |
| Hispanic                                      |                               | 4.2            |                                  | 4.4             |          |
| Other                                         |                               | 2.4            |                                  | 1.4             |          |
| Smoking Status (%)                            |                               |                |                                  |                 |          |
| Never                                         |                               | 45.1           |                                  | 45.9            | 0.10     |
| Former                                        |                               | 39.1           |                                  | 42.9            |          |
| Current                                       |                               | 15.1           |                                  | 11.2            |          |
| Hypertension (%)                              |                               | 54.3           |                                  | 52.6            | 0.55     |
| Age (median, years)                           | 57.0                          | (47.0 – 68.0)  | 63.0                             | (55.0 – 72.0)   | < 0.0001 |
| Body mass index (kg/m <sup>2</sup> )          | 28.0                          | (25.0 – 31.4)  | 27.8                             | (24.8 – 31.2)   | 0.52     |
| Waist circumference (cm)                      | 99.0                          | (90.0 – 107.0) | 97.0                             | (89.0 – 107.0)  | 0.17     |
| Neck circumference (cm)                       | 38.5                          | (35.1 – 41.8)  | 38.0                             | (34.8 – 41.0)   | 0.07     |
| Total cholesterol (mg/dl)                     | 208.0                         | 184.0 – 237.0) | 204.0                            | (180.0 – 229.0) | 0.32     |
| HDL cholesterol (mg/dl)                       | 48.5                          | (39.0 – 59.0)  | 47.0                             | (38.0 – 58.0)   | 0.28     |
| Apnea-hypopnea index <sup>†</sup> , events/hr | 4.3                           | (1.1 – 12.2)   | 4.4                              | (1.3 – 11.0)    | 0.54     |
| Apnea index <sup>†</sup> , events/hr          | 0.4                           | (0.0 – 2.6)    | 0.4                              | (0.0 – 2.3)     | 0.96     |
| Hypopnea index <sup>†</sup> , events/hr       | 3.1                           | (0.9 – 7.8)    | 3.2                              | (1.0 – 7.7)     | 0.87     |

\*IQR = 25<sup>th</sup> – 75<sup>th</sup> percentile; <sup>†</sup>Apneas and hypopneas based on a 4% oxyhemoglobin desaturation criterion.

**Table 2E:** Median (interquartile range) of the apnea index and hypopnea index as a function of different oxyhemoglobin desaturation ( $\Delta\text{SaO}_2$ ) criteria.

| $\Delta\text{SaO}_2$ criteria   | Apnea index (events/hr) |                         | Hypopnea index (events/hr) |                             |
|---------------------------------|-------------------------|-------------------------|----------------------------|-----------------------------|
|                                 | CVD (+)                 | CVD (-)                 | CVD (+)                    | CVD (-)                     |
| Any $\Delta\text{SaO}_2$        | 1.63<br>(0.32 – 6.45)   | 0.98**<br>(0.19 – 4.04) | 29.57<br>(19.38 – 42.19)   | 25.48 **<br>(16.70 – 36.72) |
| $\Delta\text{SaO}_2 \geq 2.0\%$ | 1.40<br>(0.25 – 5.86)   | 0.73**<br>(0.15 – 3.41) | 18.46<br>(11.39 – 28.40)   | 14.44**<br>(8.06 – 23.66)   |
| $\Delta\text{SaO}_2 \geq 3.0\%$ | 1.05<br>(0.17 – 5.09)   | 0.55**<br>(0.00 – 2.81) | 9.85<br>(5.03 – 17.63)     | 6.88**<br>(2.85 – 13.62)    |
| $\Delta\text{SaO}_2 \geq 4.0\%$ | 0.73<br>(0.00 – 3.69)   | 0.34**<br>(0.00 – 2.07) | 4.73<br>(1.85 – 9.84)      | 2.96**<br>(0.91 – 7.25)     |

\*\*p < 0.0001 comparing CVD (+) with CVD (-) groups.

**Table 3E:** Pearson’s correlation coefficients (95% confidence interval) between the apnea index and hypopnea index at varying degrees of oxyhemoglobin desaturation ( $\Delta\text{SaO}_2$ ).

| Oxyhemoglobin<br>Desaturation<br>Criteria |                               | Apnea index (events/hr)  |                               |                               |                               |
|-------------------------------------------|-------------------------------|--------------------------|-------------------------------|-------------------------------|-------------------------------|
|                                           |                               | Any $\Delta\text{SaO}_2$ | $\Delta\text{SaO}_2 \geq 2\%$ | $\Delta\text{SaO}_2 \geq 3\%$ | $\Delta\text{SaO}_2 \geq 4\%$ |
| Hypopnea<br>Index                         | Any $\Delta\text{SaO}_2$      | 0.19 (0.16 – 0.21)       | 0.18 (0.16 – 0.21)            | 0.17 (0.15 – 0.20)            | 0.15 (0.13 – 0.18)            |
|                                           | $\Delta\text{SaO}_2 \geq 2\%$ | 0.29 (0.27 – 0.31)       | 0.30 (0.27 – 0.32)            | 0.29 (0.27 – 0.32)            | 0.28 (0.26 – 0.30)            |
|                                           | $\Delta\text{SaO}_2 \geq 3\%$ | 0.33 (0.31 – 0.36)       | 0.35 (0.32 – 0.37)            | 0.36 (0.33 – 0.38)            | 0.36 (0.34 – 0.38)            |
|                                           | $\Delta\text{SaO}_2 \geq 4\%$ | 0.35 (0.33 – 0.37)       | 0.36 (0.34 – 0.38)            | 0.38 (0.36 – 0.40)            | 0.40 (0.38 – 0.42)            |

**Figure 1E:** Adjusted log odds for prevalent cardiovascular disease derived from multivariable logistic regression models for the apnea index at different oxyhemoglobin desaturation thresholds (A:  $\geq 4\%$ , B:  $\geq 3\%$ , C:  $\geq 2\%$ , D: Any desaturation). Covariates include age, gender, race, body mass index, waist circumference, neck circumferences, total cholesterol, HDL cholesterol, smoking status, and the hypopnea index at the same threshold as the apnea index. Cut-points for the first quartile were as follows: (A)  $< 0.01$  events/hr; (B)  $< 0.14$  events/hr; (C)  $< 0.17$  events/hr; and (D)  $< 0.22$  events/hr.

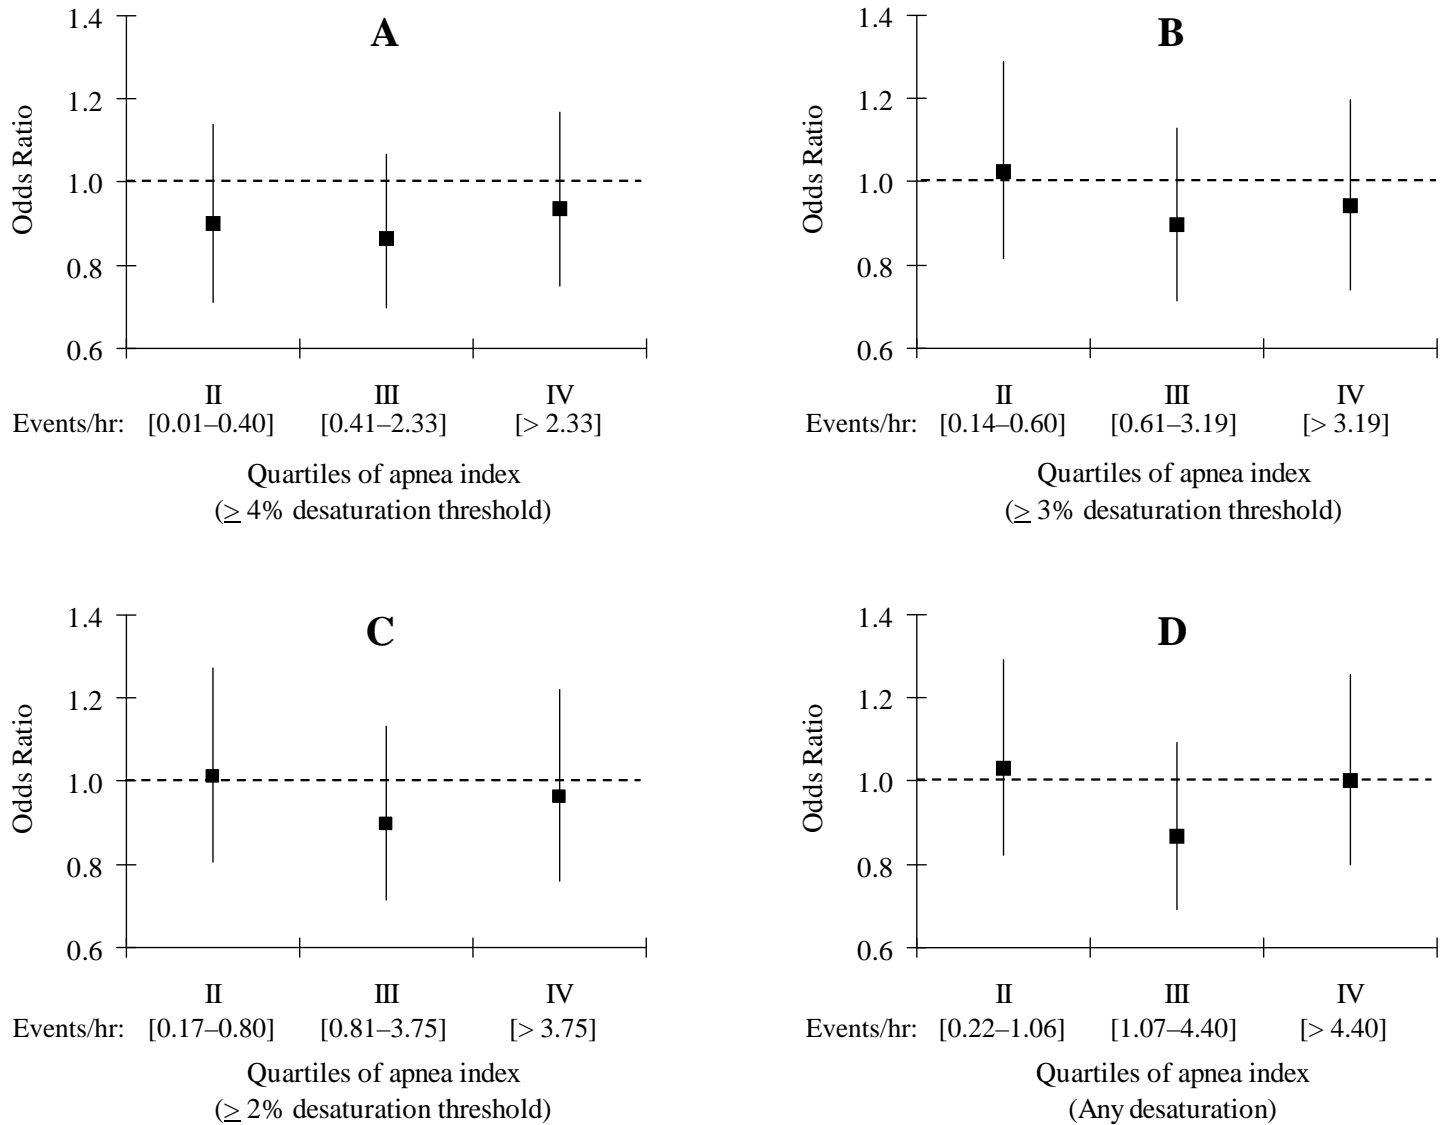

**Figure 2E:** Adjusted log odds for prevalent cardiovascular disease derived from multivariable logistic regression models for the hypopnea index at different oxyhemoglobin desaturation thresholds (A:  $\geq 4\%$ , B:  $\geq 3\%$ , C:  $\geq 2\%$ , D: Any desaturation). The criteria for defining hypopneas included the presence of oxyhemoglobin desaturation or an EEG arousal. Covariates include age, gender, race, body mass index, waist circumference, neck circumferences, total cholesterol, HDL cholesterol, smoking status, and the hypopnea index at the same threshold as the apnea index. Cut-points for the first quartile were as follows: (A)  $< 3.98$  events/hr; (B)  $< 5.80$  events/hr; (C)  $< 10.16$  events/hr; and (D)  $< 17.12$  events/hr.

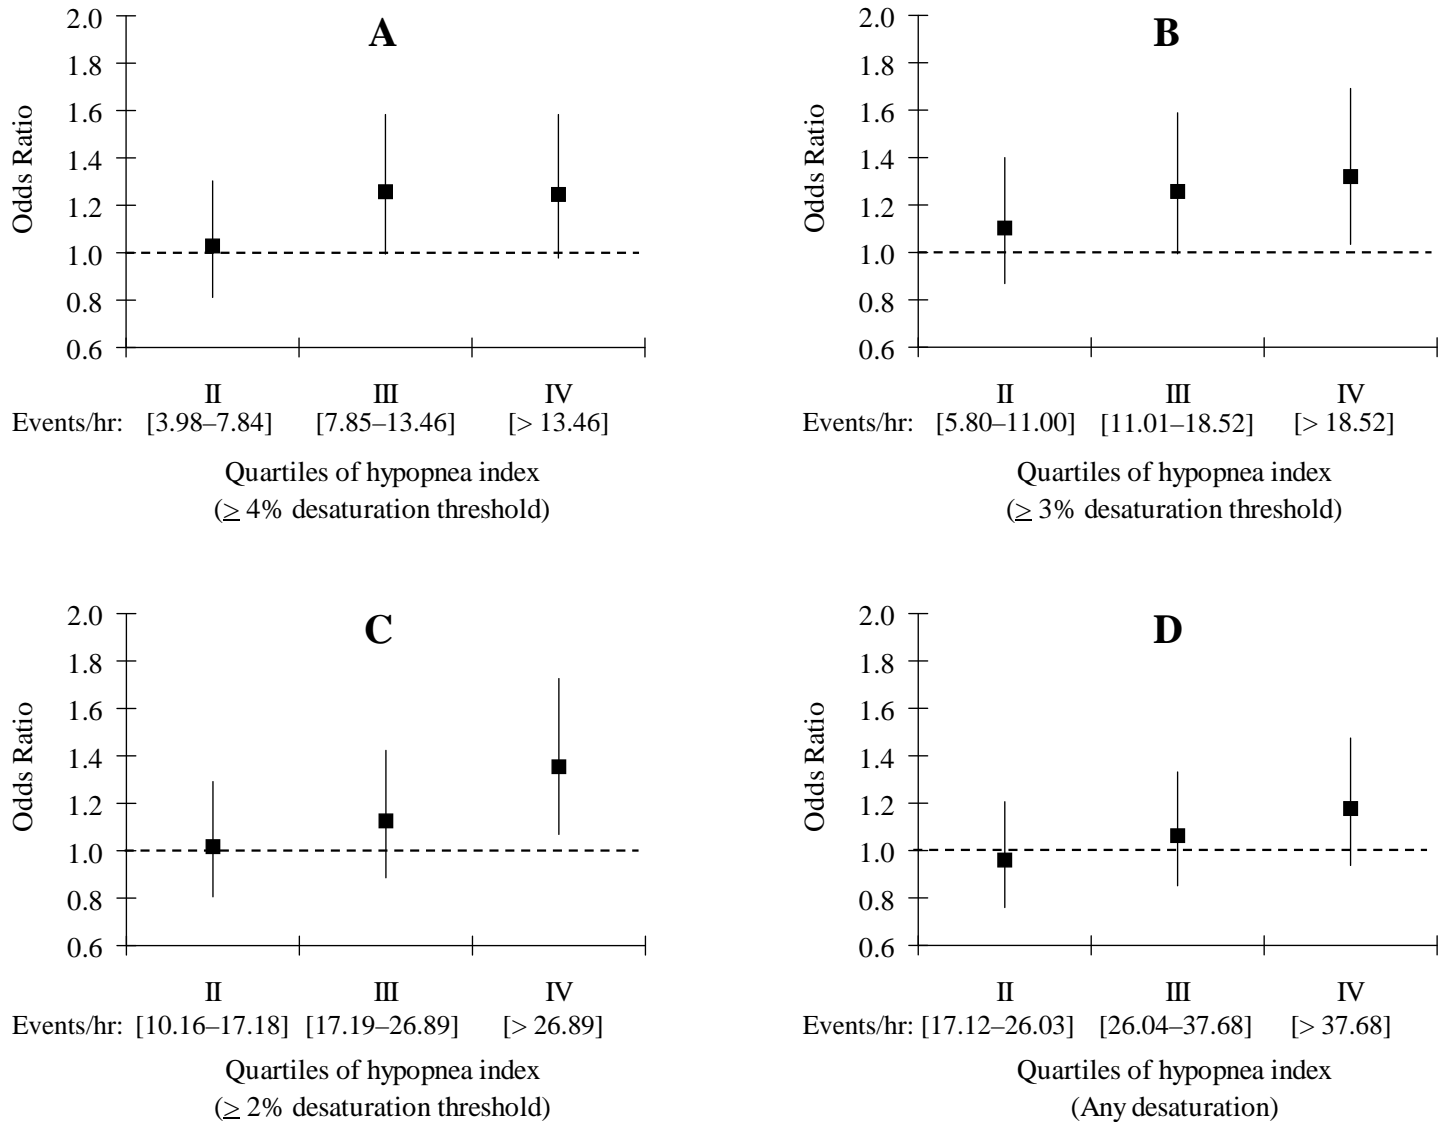

Supplement: ajrccm_177_10_1150__1.pdf [file ajrccm_177_10_1150__1.pdf]
